# Supplementary material
Source: PubMed Central journal article supplement (PMC4054185)
Supplement: JB.00038-14_zjb999093195so1.pdf [file JB.00038-14_zjb999093195so1.pdf]

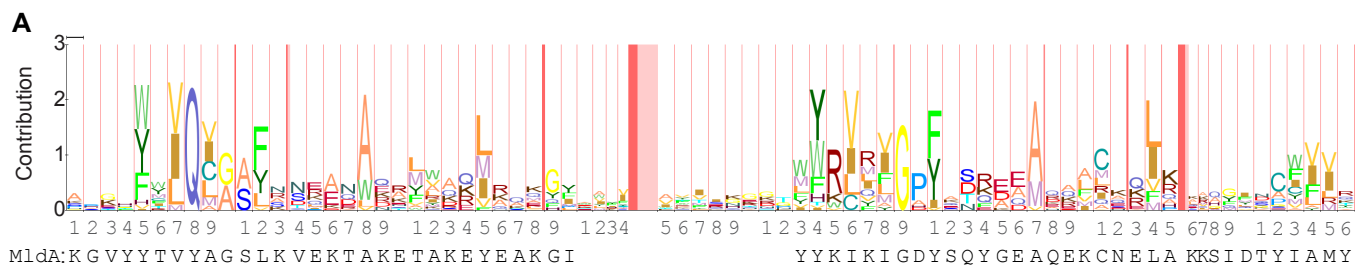

**B**

**MldA**

MKVLSENNII RNTVLNVTAS FLKQESKINE KLDGVLEKKF EKVEFNKAY AELLKFNILF YKTLARNTPEP  
 LIGKWIWDKY IPEIDELEKD LELTTAKCRK YVNKAMKEGL DSLKANDLNS FLAYDKMELS ERRRRLEKDY  
 KVLNLYKDLL NISLRKISLE KKECGDLFLK NQADAKRELK REIIFCVNKI LASNKDVVFN NVEENNEQDK  
 VEIKATEIED LQLGKDNSEN DMLLNEIKNS KVKHESKSD IESKFIDKLN SLNNEVSQSQT IHNEYKKLCG  
 LEELHVSVEGY GFGKEI IKDF ACATVVLEFL KRRNRDLIEG AMRLTIIGEF GPENFKFVD YVIKNKTEIS  
 EDTWNKAQNL IKDNYSELEN HEIASKRTRR NKDIDIEEYI YMIKNADKDI CFRSSISIED DAEEGVKEEI  
 DSNNQDIGDV VEDKDTTDEKE YDSNKEDIEE PENKKSCKKA KLFGFIKKDN EEVEQEEENL NDISPDIILD  
 KPVENNQVKS EEIEQNELKE IKQEEPSQHI EEERSVKIEK PINNNLDEKV SSNNESKLEK ESKNLEDKKA  
 KEIKEEKLEN EKSVVIPIKK KENSNNKSKN SSKDKYRENK KEMKNYVSDK EDSDDEEEVV SKKSRLKETI  
 IAVVIVVIVG VGYFITVGNK KKNDKENIPK SSTQQANNK LTFEEKKAQA EKEKKEAEEK AKAEKEAQEK  
 AQAEKKAKEM EAYKDGKGVY YTVYAGSLKV EKTAKETAKE YEAKGISSTI IQENGYKIK IGDYSQYGEA  
 QEKCNELAKK SIDTYIAMYD KYYDYKLEEL KESAPLSAE ELKQYEDLR SELKNKSGYR EYVKHLDKLY  
 EEIVEGA

**MldB**

MLKLGEKIIY ELSDFGFLSG ISRYSKEYKK LHITNLGNII ISKSDEVNED TGVKYYISFS DNKEKLEAVL  
 EDSQIIVYGN NLPPYIKSEN SSKNVNTANLT MKITLDEYDL ICKSQREFIF YLKDNTMILS LDDNKFYMGG  
 INKDNEKWFIF ISGKNRFEIN FDDIERYLE DKRVSILKGYF HMEREGIIVR SVSIFNNDID SVVPSDLNER  
 VKDNQKIGNL PKDCEIVFCK ISGNIDGFDY KNTNMLLVKY QDQLIFINKK SKKTIVKSAAK QNCSKLNLGE  
 DIILYDNKNV FNLHINDKNR EIMQIDDLKD IENEIVGYTL KHAPFFIQED FDSLTLKSF QKEIISIKNS  
 DIKDIVINKE FENENSNFVE TEIKFNQKV LLNLSKSMVQ KLMQDVFIYA KQPLLKENS I EVIYKNWSKA  
 MNDMIIFNFF GNIYYMKSEF DKILEKELND EIRIEVINSL YKQIQEQRNN LDLLSAYMPR ILENQEIDLF  
 EKYNTKLDVQ VFKQIKNLLS DLSYNISSYL NEVEKSLDNI IFVISGEDKK KYNRYMLKES ESASLDVFLK  
 QAISRNLHLV ENMYPYVDE TSREMFKLFE LLWKNYRNID DDSIKEILFE RITNTYVFKQ LTLNNTKER  
 RKDIIEKIYN SVDYGTNKLD ENMFFTGGIK YVK

**MldC**

MSSKYNVWTF NYEFLGLDSG DEKNNEVYYE IDLDEILNEN YIDEDIDSGL DSDGNSILGE LISEMDDED  
 VSVDMTYQEL EVDLEDLDSY LDEDIDSDIK GILDEI

**FIG. S1.** Sequences of Mld proteins. (A) The putative SPOR domain from MldA (residues 717-789) was aligned by hand to the Pfam HMM logo for SPOR domains (1). The alignment revealed matches to one of the top three amino acids at 28 out of 76 positions, consistent with previous evidence that SPOR domain sequences are highly degenerate (2). (B) The predicted amino acid sequences of MldA, MldB and MldC. Positively charged residues are in blue, negatively charged residues are in red. For MldA, the predicted coiled-coil regions are underlined in grey, the transmembrane helix is highlighted in grey and the SPOR domain is underlined in black. Predicted coiled-coil regions in MldB are underlined in grey (3).

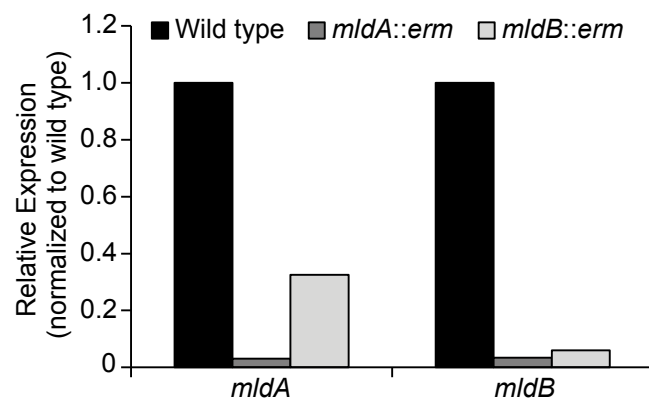

**FIG. S2.** Expression of *mldA* is reduced in an *mldB::erm* mutant. RNA was harvested from wild-type and mutant *C. difficile* strains in logarithmic growth, and qRT-PCR was used to assess mRNA levels for *mldA* and *mldB*. The housekeeping gene *rpoB* was used for normalization. Oligonucleotide primers are listed in Table S1.

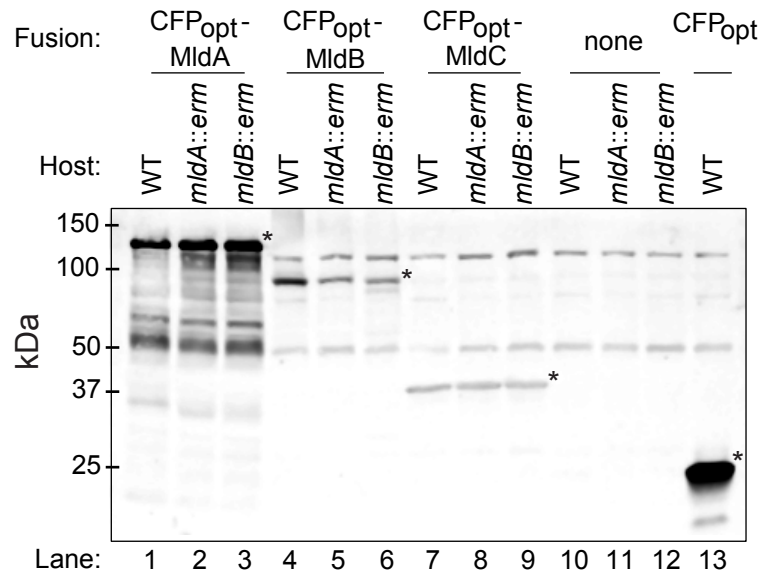

**FIG. S3.** Expression of CFP<sub>opt</sub>-Mld fusion proteins in wild-type and *mld* mutant backgrounds. Whole cell extracts were prepared from the same cultures used for localization (Fig. 4). Steady-state levels of CFP<sub>opt</sub> fusion proteins were determined by Western blotting with polyclonal anti-GFP antibodies that recognize CFP<sub>opt</sub>. Note that the same amount of tetracycline (500 ng/ml) was used for induction in all cases, so the differences in fusion protein abundance may reflect differential stability. The Western results are consistent with the relative brightness of the CFP fusions in Figure 4. Molecular mass standards are indicated to the left of the blot. Asterisks denote the various CFP<sub>opt</sub> fusion proteins, the predicted masses of which are CFP<sub>opt</sub>-MldA = 126 kDa, CFP<sub>opt</sub>-MldB = 106 kDa, CFP<sub>opt</sub>-MldC = 39.5 kDa, CFP<sub>opt</sub> = 27.7 kDa.

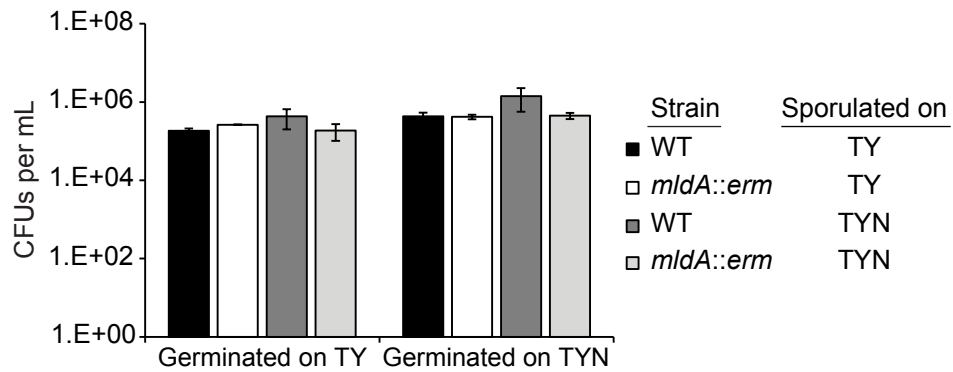

**FIG. S4.** Sporulation and germination. Wild type and mutant *C. difficile* strains were allowed to sporulate on TY or TYN plates. Spores were harvested using equal volumes of PBS and then heat-killed at 65°C for 10 min. Serial dilutions were spread onto either TY or TYN containing 0.1% taurocholate to stimulate germination of spores. No colonies were detected on plates that lacked taurocholate. Samples were normalized to volumes of PBS used to process each plate.

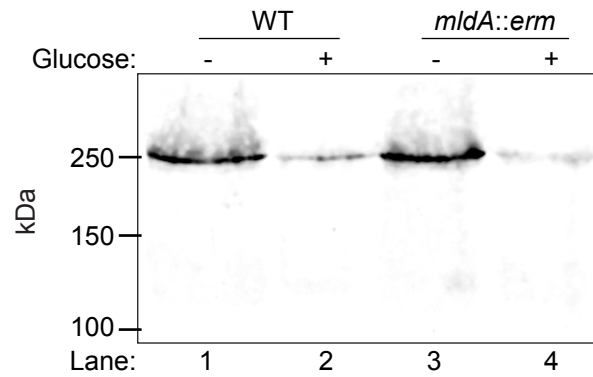

**FIG. S5.** Toxin A production. Cell-free spent medium was concentrated approximately 100-fold and analyzed by Western blotting with a monoclonal antibody against toxin A (predicted mass 306 kDa). Molecular mass standards are indicated to the left of the blot. Glucose in the growth medium is known to repress toxin A production and was included in some cultures to verify antibody specificity (4). Samples were normalized to volume of spent medium.

Table S1. Oligonucleotide primers used in this study.

| Oligo  | Purpose                                                                            | Sequence 5'-3'*                                                   |
|--------|------------------------------------------------------------------------------------|-------------------------------------------------------------------|
| CDE914 | EBS universal primer                                                               | CGAAATTAGAAACTTGCGTTCAGTAAAC                                      |
| NF1438 | Reverse primer for sequencing inserts in pRPF185                                   | GATCCAGCACACTGGCATCTTTTTATTTAGG<br>GATTTCTCAC                     |
| P1447  | IBS for constructing <i>mldA</i> <sub>248</sub> :: <i>erm</i>                      | AAAAAAGCTTATAATTATCCTTAGAAAAAGAT<br>TTAGTGCGCCCAGATAGGGTG         |
| P1448  | EBS1 for constructing <i>mldA</i> <sub>248</sub> :: <i>erm</i>                     | CAGATTGTACAAATGTGGTGATAACAGATAA<br>GTCGATTTAGATAACTTACCTTTCTTTGT  |
| P1449  | EBS2 for constructing <i>mldA</i> <sub>248</sub> :: <i>erm</i>                     | TGAACGCAAGTTTCTAATTTTCGGTTTTTCTC<br>GATAGAGGAAAGTGTCT             |
| RP1    | Verifying insertion in <i>mldA</i> gene                                            | GAAGCAAATATGCAGAGC                                                |
| RP2    | Verifying insertion in <i>mldA</i> gene                                            | GCGTCTTCTTCTCTCTGATAGTTCC                                         |
| RP26   | Intergenic PCR between <i>cd2718-mldA</i>                                          | TAGGTCGCTTGAGCCTATTGGTGA                                          |
| RP27   | Intergenic PCR between <i>cd2718-mldA</i>                                          | CCATTTGCCAATAAGTGGTTCTGT                                          |
| RP28   | Intergenic PCR between <i>mldA-mldB</i><br>Verifying insertion in <i>mldB</i> gene | GAATCAGCTCCTTCTTTGAGTGC                                           |
| RP29   | Intergenic PCR between <i>mldA-mldB</i><br>Verifying insertion in <i>mldB</i> gene | AAAGGCAAGTTATTTCCATAGAC                                           |
| RP30   | Intergenic PCR between <i>mldB-mldC</i>                                            | GAAAGTGAAAGTGCAAGTCTTGATG                                         |
| RP31   | Intergenic PCR between <i>mldB-mldC</i>                                            | ACACTGACATCCTCATCTATATCC                                          |
| RP56   | Intergenic PCR between <i>mldC-gtaB</i>                                            | GAGTTCTTAGGATTGGACTCAGGG                                          |
| RP33   | Intergenic PCR between <i>mldC-gtaB</i>                                            | GCACAGTAAATTGCATGTCCAAGAC                                         |
| RP34   | qRT-PCR for <i>mldA</i>                                                            | ACAGAACCACCTTATTGGCAAATGG                                         |
| RP35   | qRT-PCR for <i>mldA</i>                                                            | GAGAGTCTAATCCCTCTTTCATAGCC                                        |
| RP36   | qRT-PCR for <i>mldB</i>                                                            | CAGATGGGTTTGAGCTTAGTGCCA                                          |
| RP37   | qRT-PCR for <i>mldB</i>                                                            | ACACCTGTATCCTCATTAACCTTCATCTG                                     |
| RP200  | qRT-PCR for <i>mldC</i>                                                            | GAGTTCTTAGGATTGGACTCAGG                                           |
| RP201  | qRT-PCR for <i>mldC</i>                                                            | TCCATCAGAATCTAAACCACTATCT                                         |
| RP58   | qRT-PCR for <i>gtaB</i>                                                            | CCTGCAATTGAAGAAGCTCCATCTG                                         |
| RP59   | qRT-PCR for <i>gtaB</i>                                                            | TCTCCACCTTTACCAGGTGTCTGT                                          |
| TEQ009 | qRT-PCR for <i>rpoB</i>                                                            | AAGAGCTGGATTGGAAGTGCCTGA                                          |
| TEQ010 | qRT-PCR for <i>rpoB</i>                                                            | ACCGATATTTGGTCCCTCTGGAGT                                          |
| RP47   | Sequencing <i>mldA</i>                                                             | GTAGTATTTCAATAGAAGATGATGCTGAAGA<br>AGGGG                          |
| RP48   | Sequencing <i>mldA</i>                                                             | CTTCTTTATTGCTGTCGTA CTCTTTATCTGT<br>A<br>G                        |
| RP80   | Sequencing <i>mldB</i>                                                             | CGATAGCTTGACTATTCTAAAGTC                                          |
| RP81   | Sequencing <i>mldB</i>                                                             | CATCTTGCATAAGTTTTTGAACCATAC                                       |
| RP114  | IBS for constructing <i>mldB</i> <sub>153</sub> :: <i>erm</i>                      | AAAAAAGCTTATAATTATCCTTAAATGACGAT<br>ACAGTGCGCCCAGATAGGGTG         |
| RP115  | EBS1 for constructing <i>mldB</i> <sub>153</sub> :: <i>erm</i>                     | CAGATTGTACAAATGTGGTGATAACAGATAA<br>GTCGATACAGGTA ACTTACCTTTCTTTGT |
| RP116  | EBS2 for constructing <i>mldB</i> <sub>153</sub> :: <i>erm</i>                     | TGAACGCAAGTTTCTAATTTTCGGTTTCATTC<br>CGATAGAGGAAAGTGTCT            |
| RP160  | Cloning CFP <sub>opt</sub> into pRPF185                                            | CCCGGATCCTTACTTATATAATTCATCCATTC<br>C                             |
| RP161  | Cloning CFP <sub>opt</sub> into pRPF185                                            | GGGGAGCTCCTGCAGTAAAGGAGAAAATTT<br>TATGGTTTTCAAAGGAGAGAATTATTTAC   |
| RP164  | Cloning <i>mldABC</i> , <i>mldAB</i> and <i>mldA</i> into pRPF185                  | GGGGAGCTCCTGCAGTAAAGGAGAAAATTT<br>TAAGGTTTTGAGTGAAAATAATAATAAG    |
| RP165  | Cloning <i>mldABC</i> and <i>mldC</i> into pRPF185                                 | CCCGGATCCAATTTTCATCTAAGATGCCTTTT<br>ATATC                         |
| RP166  | Forward primer for sequencing inserts in pRPF185                                   | CATTGATAGAGTTATTTGTCAAACCTAG                                      |

|       |                                                                  |                                                                                          |
|-------|------------------------------------------------------------------|------------------------------------------------------------------------------------------|
| RP171 | Cloning <i>cfp<sub>opt</sub></i> – MCS <sup>†</sup> into pRPF185 | <u>GGCGGATCC</u> GGCGCGCCTCAGCTGTTTAAT<br>TAAGTCGACGCATGCGTTCATCTTATATAAT<br>TCATCCATTCC |
| RP178 | Cloning <i>cfp<sub>opt</sub></i> – <i>mldA</i> fusion            | <u>AAAGCATGCGT</u> GAAAGGTTTTGAGTGAAAATA<br>ATATAATAAGAAACTG                             |
| RP179 | Cloning <i>cfp<sub>opt</sub></i> – <i>mldA</i> fusion            | <u>TTTGGCGCGCC</u> TAAGCACCTTCAACTATTT<br>CTTCATAAAGTTTATC                               |
| RP184 | Cloning <i>mldB</i> into pRPF185                                 | <u>GGGGAGCTCCT</u> GCAGTAAAGGAGAAAATTT<br>TATGTTGAAATTAGGAGAAAAAATCATATA                 |
| RP185 | Cloning <i>mldC</i> into pRPF185                                 | <u>GGGGAGCTCCT</u> GCAGTAAAGGAGAAAATTT<br>TATGTCAAGTAAATACAATGTTTGGACTTT                 |
| RP186 | Cloning <i>mldA</i> into pRPF185                                 | <u>CCCGGATCC</u> TAAGCACCTTCAACTATTTCT<br>TCATAAAG                                       |
| RP187 | Cloning <i>mldB</i> and <i>mldAB</i> into pRPF185                | <u>CCCGGATCC</u> TTACTTGACATACTTTATTCCT<br>CCTGTG                                        |
| RP196 | Cloning <i>cfp<sub>opt</sub></i> – <i>mldB</i> fusion            | <u>AAAGCATGCAT</u> GTTGAAATTAGGAGAAAAAA<br>TCATATATGAGC                                  |
| RP197 | Cloning <i>cfp<sub>opt</sub></i> – <i>mldB</i> fusion            | <u>TTTGGCGCGCC</u> TTACTTGACATACTTTATTC<br>CTCCTGTG                                      |
| RP198 | Cloning <i>cfp<sub>opt</sub></i> – <i>mldC</i> fusion            | <u>AAAGCATGCAT</u> GTCAAGTAAATACAATGTTT<br>GGACTTT                                       |
| RP199 | Cloning <i>cfp<sub>opt</sub></i> – <i>mldC</i> fusion            | <u>TTTGGCGCGCC</u> CTAAATTCATCTAAGATGC<br>CTTTTATATC                                     |

\* Restriction sites underlined.

† MCS, multicloning site.

Table S2. Sequence identities and E-values of MldABC homologs\*

| Organism                                       | MldA                                            | MldB                                            | MldC                                              |
|------------------------------------------------|-------------------------------------------------|-------------------------------------------------|---------------------------------------------------|
| <i>Clostridium difficile</i> CD196             | YP_003215577 (2559)<br>847 a.a.<br>E-value 0.0  | YP_003215576 (2558)<br>663 a.a.<br>E-value 0.0  | YP_003215575 (2557)<br>106 a.a.<br>E-value 2e-65  |
| <i>Clostridium difficile</i> BI1               | YP_006199787 (13235)<br>847 a.a.<br>E-value 0.0 | YP_006199786 (13230)<br>663 a.a.<br>E-value 0.0 | YP_006199785 (13225)<br>106 a.a.<br>E-value 2e-65 |
| <i>Clostridium difficile</i> R20291            | YP_003219085 (2606)<br>847 a.a.<br>E-value 0.0  | YP_003219084 (2605)<br>663 a.a.<br>E-value 0.0  | YP_003219083 (2604)<br>106 a.a.<br>E-value 2e-65  |
| <i>Clostridium difficile</i> NAP07             | EFH14798 (2596)<br>844 a.a.<br>E-value 0.0      | EFH14797 (2595)<br>663 a.a.<br>E-value 0.0      | EFH14796 (2594)<br>106 a.a.<br>E-value 5e-63      |
| <i>Clostridium hiranonis</i>                   | EEA85283<br>839 a.a.<br>E-value 7e-113          | EEA85284<br>665 a.a.<br>E-value 0.0             | EEA85285<br>104 a.a.<br>E-value 1e-6              |
| <i>Peptostreptococcus anaerobius</i> CAG:653-L | EFD05099<br>985 a.a.<br>E-value 2e-38           | EFD05083<br>660 a.a.<br>E-value 3e-134          | HMPREF0631_1876<br>58 a.a.<br>E-value 4e-2        |
| <i>Peptostreptococcus stomatis</i> DSM 17678   | WP_007789343<br>947 a.a.<br>E-value 7e-38       | Unannotated ORF<br>575 a.a.<br>E-value 2e-108   | Unannotated ORF<br>58 a.a.<br>E-value 2.2e-2      |

\*Determined using BLAST searches (5)



Table S3. Complementation of *mld* mutants.

| Strain           |               | Cells Scored | Cell Length* | Septa per Cell |       |       |       |       |       |
|------------------|---------------|--------------|--------------|----------------|-------|-------|-------|-------|-------|
| host             | plasmid       |              |              | 0              | 1     | 2     | 3     | 4-5   | ≥6    |
| Wild type        | vector        | 451          | 8.7 ± 2.9    | 36.8%          | 59.9% | 3.1%  | 0.2%  | 0%    | 0%    |
| <i>mldA::erm</i> | vector        | 315          | 11.7 ± 6.0   | 13.3%          | 30.5% | 21.9% | 14.3% | 14.3% | 5.7%  |
| <i>mldA::erm</i> | <i>mldABC</i> | 323          | 10.9 ± 4.0   | 20.7%          | 60.7% | 14.9% | 2.8%  | 0.9%  | 0%    |
| <i>mldA::erm</i> | <i>mldAB</i>  | 328          | 13.1 ± 5.6   | 11.3%          | 48.8% | 20.7% | 14.6% | 3.7%  | 0.9%  |
| <i>mldA::erm</i> | <i>mldA</i>   | 217          | 11.6 ± 5.6   | 11.1%          | 38.2% | 20.7% | 15.2% | 11.1% | 3.7%  |
| <i>mldA::erm</i> | <i>mldBC</i>  | 212          | 11.0 ± 5.6   | 12.3%          | 37.3% | 17.5% | 17.5% | 10.4% | 5.2%  |
| <i>mldA::erm</i> | <i>mldB</i>   | 201          | 10.8 ± 4.9   | 12.9%          | 37.8% | 15.4% | 13.9% | 15.9% | 4.0%  |
| <i>mldA::erm</i> | <i>mldC</i>   | 219          | 11.2 ± 5.1   | 9.1%           | 39.7% | 20.1% | 18.3% | 9.1%  | 3.7%  |
| <i>mldB::erm</i> | vector        | 211          | 13.9 ± 7.0   | 8.1%           | 38.4% | 14.7% | 11.4% | 14.7% | 12.8% |
| <i>mldB::erm</i> | <i>mldABC</i> | 207          | 11.4 ± 5.0   | 41.1%          | 53.1% | 4.3%  | 1.4%  | 0%    | 0%    |
| <i>mldB::erm</i> | <i>mldAB</i>  | 229          | 14.6 ± 10.4  | 17.5%          | 55.0% | 14.0% | 11.8% | 1.7%  | 0%    |
| <i>mldB::erm</i> | <i>mldA</i>   | 109          | 15.5 ± 9.8   | 8.3%           | 31.2% | 16.5% | 13.8% | 20.2% | 10.1% |
| <i>mldB::erm</i> | <i>mldBC</i>  | 105          | 11.3 ± 6.4   | 12.4%          | 34.3% | 13.3% | 21.9% | 12.4% | 5.7%  |
| <i>mldB::erm</i> | <i>mldB</i>   | 107          | 11.5 ± 8.5   | 14.0%          | 27.1% | 12.1% | 19.6% | 15.0% | 12.1% |
| <i>mldB::erm</i> | <i>mldC</i>   | 106          | 11.5 ± 6.6   | 9.4%           | 23.6% | 16.0% | 15.1% | 19.8% | 16.0% |

\* Mean ± standard deviation, in  $\mu\text{m}$ .

## References

1. **Schuster-Bockler B, Schultz J, Rahmann S.** 2004. HMM Logos for visualization of protein families. *BMC Bioinformatics* **5**:7.
2. **Williams KB, Yahashiri A, Arends SJ, Popham DL, Fowler CA, Weiss DS.** 2013. Nuclear magnetic resonance solution structure of the peptidoglycan-binding SPOR domain from *Escherichia coli* DamX: insights into septal localization. *Biochemistry* **52**:627-639.
3. **Lupas A.** 1996. Prediction and analysis of coiled-coil structures. *Methods Enzymol* **266**:513-525.
4. **Dupuy B, Sonenshein AL.** 1998. Regulated transcription of *Clostridium difficile* toxin genes. *Mol Microbiol* **27**:107-120.
5. **Altschul SF, Wootton JC, Gertz EM, Agarwala R, Morgulis A, Schaffer AA, Yu YK.** 2005. Protein database searches using compositionally adjusted substitution matrices. *FEBS J* **272**:5101-5109.
